# Supplementary material for: Novel Gene Acquisition on Carnivore Y Chromosomes
Source: PLoS Genet. 2006 Mar 31;2(3):e43. doi: 10.1371/journal.pgen.0020043 (PMC1420679; doi:10.1371/journal.pgen.0020043)

### Fig. S3. Alignments of TETY2 homologs to canine and human X chromosomes

**a. Conservation of cat *TETY2* cds to canine chrX.** Matching bases in *TETY2* cDNA and canine genomic sequences are colored blue and capitalized. Light blue bases mark the boundaries of gaps in either sequence (often splice sites). The dog ESTs (Table 1) collectively match a larger span of the dog X chromosome (pos. 6,507,232-6,534,282) which was used in the Blat search to the human X chromosome in b (bottom of page).

(positions 6,568,881-6,569,818bp in dog July 2004 X assembly):

```

attttatgtt ttctcttttg tgttcccggc ttaacttcac gatgcctcta 6568931
ccttgtcggt agtcaaccgg aagtgaagca ctattttctc aaactgacca 6568981
CCCTcTTTTT CAGTTATtTG GCCTGGGCTc ctGGCATCAG cCTAGCtggc 6569031
AGCccATCCTT GGtGCagGTG GGAGTTgAAg AGCAACATCA TTGGACTtTG 6569081
GGAAGCTcTC cAgTTTCAAA AATTgaaagc tctggctccA TTGTTGAGTT 6569131
GCAGGATCAA TGGgAaCTGG GTCATTTCaC ataaAAATCT GGTATGGGCA 6569181
GGA CCTGATA TTGcgGGCAA ATTtTaTcAA gTCaGTAGTC CTGATTTTGTG 6569231
GcTCgGTGGC ACTTtTGtTC tGCaGGATCC ATGCCCCgTg CCCAGATTTC 6569281
CTTtGATcaT GTTACAACAT CTCTGCCTTC TTTctttctt tttttttttt 6569331
ttaagatttt atttatttat tcatgagaga cacacagaga gagagaagca 6569381
gagacacagg cagaggggaga agcaggctcc acgcagggaa cccgatgtgg 6569431
gacttgatcc caggactcca ggatcaggcc ctaggctgaa ggcaagcact 6569481
aaaccgctga gccacccagg gatccctctg ccttctttct tgtctTCaGc 6569531
TGTAGTTacA CTGCaATTAC AGTGAGCTGG AATTTTGCTG TGGATTTTTA 6569581
TGGCCAAACC ACCCcTGAcT TCCCACCTAG cTTTCCCAcT aGgAAAGAAA 6569631
TGCTcagaag gaaatgcttc tacatgTTCC CACTAGGAcT CACggCTGCC 6569681
ACCCCTCTCGC TAATAACTGC CgccATGTTC TtCTGTGaaa tattttctgt 6569731
agaacagtgg agtcaatgaa acccaagggt gtggccaagt gtcccaaaca 6569781
caaggtctga acgaagggcc tactcttttag aatgact

```

**b. *TETY2* X homologous region in the human genome.** Region of X chromosome homology to the Y-linked transcript *TETY2*, displayed in the UCSC Genome Browser Viewer (May 2004 assembly). The canine X chromosome region homologous to canine and feline *TETY2* ESTs and cDNAs (Table 1 & Fig.4) was used as the input sequence for a BLAT search (versus the human X chromosome shown). Chromosome coordinates (in base-pairs) are given above.

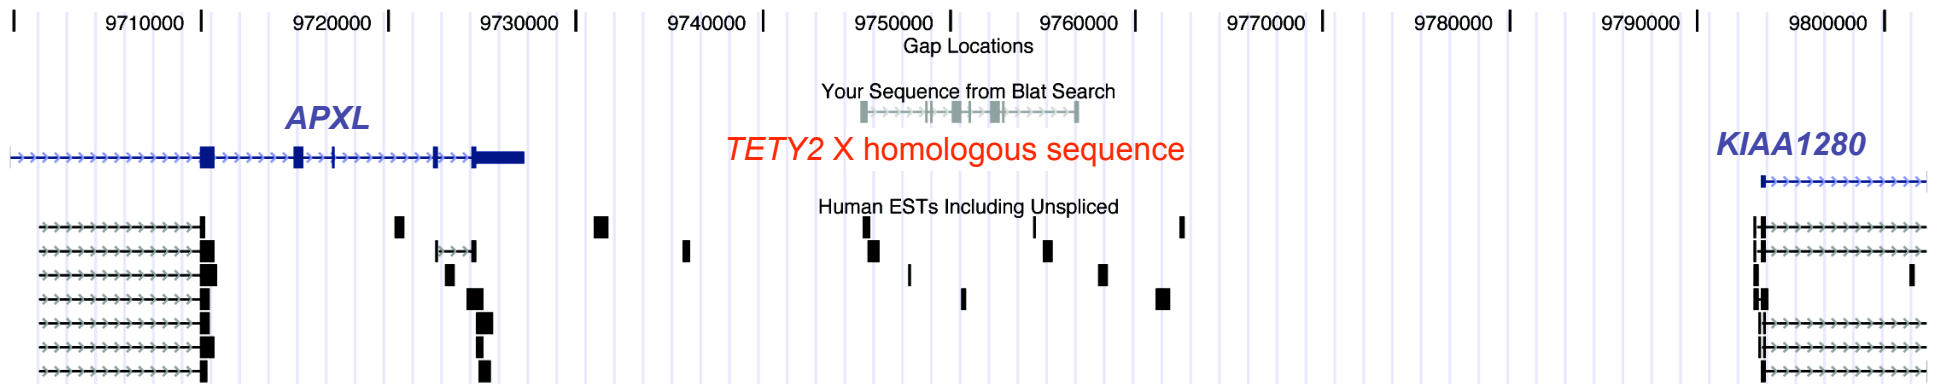

Supplement: Figure S3 — (264 KB PDF) [file pgen.0020043.sg003.pdf]
